# Supplementary material for: Association between C-reactive protein and radiotherapy-related pain in a tri-racial/ethnic population of breast cancer patients: a prospective cohort study
Source: Springer Nature journal article supplement (doi:10.1186/s13058-019-1151-y), 2019-05-28

**(A) All (N=251)**

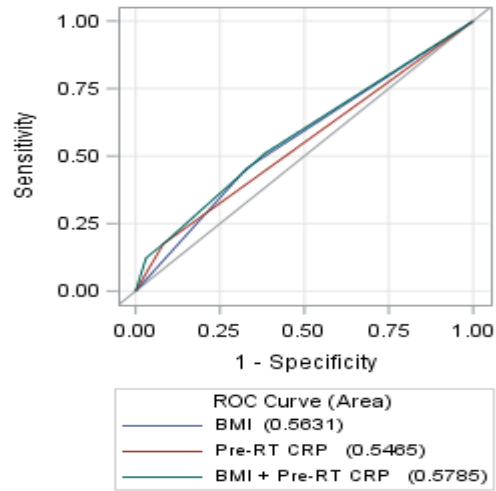

**(B) NHW (N=51)**

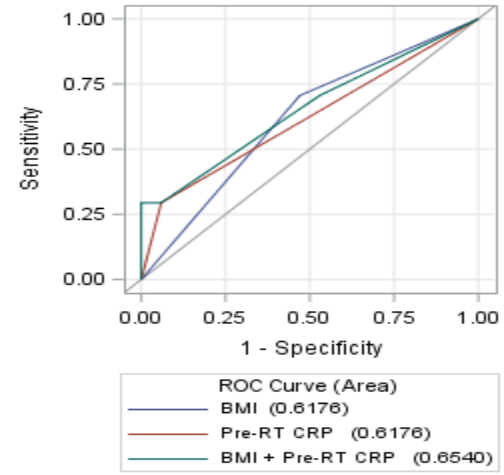

**(C) HW (n=153)**

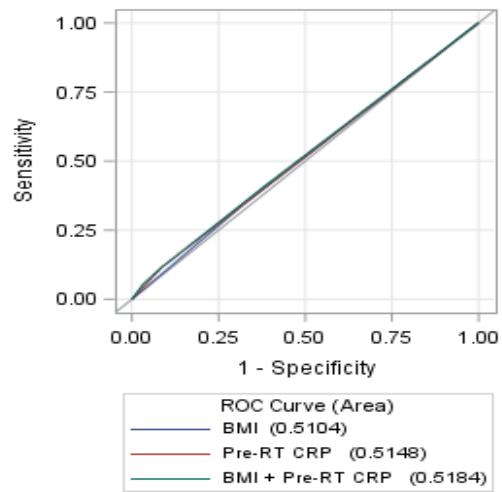

**(D) African Americans (N=47)**

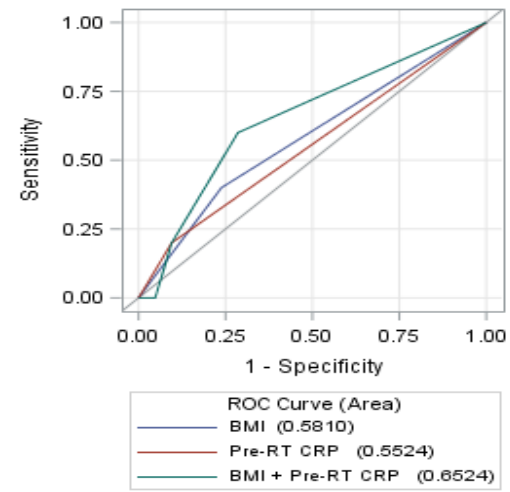

Supplement: MOESM1 [file 16756110]
